# Supplementary material
Source: ML conference proceedings conference paper supplement (https://openreview.net/forum?id=pwwVuSICBgt)
Supplement: supplementary_material [file attachment]

## Sheet: BinaryNet
											batch size	momentum precision
											100	16
			k	m	n	w		x	y	m	b	act_in
		conv1	3	3	128	3456		32	32	3	100	307200
		conv2	3	128	128	147456		32	32	128	100	13107200
		conv3	3	128	256	294912		16	16	128	100	3276800
		conv4	3	256	256	589824		16	16	256	100	6553600
		conv5	3	256	512	1179648		8	8	256	100	1638400
		conv6	3	512	512	2359296		8	8	512	100	3276800
		fc1	1	8192	1024	8388608		1	1	8192	100	819200
		fc2	1	1024	1024	1048576		1	1	1024	100	102400
		fc3	1	1024	10	10240		1	1	1024	100	102400
		output						1	1	10	100	1000
		Model Memory						Optimiser Memory								Activation Memory
		weight		bias		Total (MB)		weight gradient		momentum 1		momentum2		Total (MB)		activation		activation gradient 1		activation gradient 2		Total (MB)			Overall Total (MB)		Savings
Method	Optimiser	#	precision	#	precision			#	precision	#	precision	#	precision			#	precision	#	precision	#	precision
BNN	SGD+momentum	14022016	32	3850	32	53.5044		14022016	32	14022016	32	0	32	106.979		29185000	32	13107200	32	13107200	32	211.332			371.816		1x
BNN	ADAM	14022016	32	3850	32	53.5044		14022016	32	14022016	32	14022016	32	160.469		29185000	32	13107200	32	13107200	32	211.332			425.306		1x
BNN	Bop	0	32	3850	32	0.0146866		14022016	32	14022016	32	0	32	106.979		29185000	32	13107200	32	13107200	32	211.332			318.326		1x
Ours	SGD+momentum	14022016	16	3850	16	26.7522		14022016	1	14022016	16	0	16	28.4164		29185000	1	13107200	16	13107200	5	36.2916			91.4603		4.06533
Ours	ADAM	14022016	16	3850	16	26.7522		14022016	1	14022016	16	14022016	16	55.1613		29185000	1	13107200	16	13107200	5	36.2916			118.205		3.59803
Ours	Bop	0	16	3850	16	0.00734329		14022016	1	14022016	16	0	16	28.4164		29185000	1	13107200	16	13107200	5	36.2916			64.7154		4.91886

## Sheet: ResNetE-18
											batch size	FP16 or FP32	Binary \partial W?	PO2 \partial Y?	BN trick?
											4096	16	1	16	1
			k	m	n	w		x	y	m	b	act_in		x	y	n	b	act_out
		conv1	7	3	64	9408		224	224	3	4096	616562688		112	112	64	4096	3288334336
		bconv1	3	64	64	36864		56	56	64	4096	822083584		56	56	64	4096	822083584
		bconv2	3	64	64	36864		56	56	64	4096	822083584		56	56	64	4096	822083584
		bconv3	3	64	64	36864		56	56	64	4096	822083584		56	56	64	4096	822083584
		bconv4	3	64	64	36864		56	56	64	4096	822083584		56	56	64	4096	822083584
		conv5	1	64	128	8192		28	28	64	4096	205520896		28	28	128	4096	411041792
		bconv5	3	64	128	73728		56	56	64	4096	822083584		28	28	128	4096	411041792
		bconv6	3	128	128	147456		28	28	128	4096	411041792		28	28	128	4096	411041792
		bconv7	3	128	128	147456		28	28	128	4096	411041792		28	28	128	4096	411041792
		bconv8	3	128	128	147456		28	28	128	4096	411041792		28	28	128	4096	411041792
		conv9	1	128	256	32768		14	14	128	4096	102760448		14	14	256	4096	205520896
		bconv9	3	128	256	294912		28	28	128	4096	411041792		14	14	256	4096	205520896
		bconv10	3	256	256	589824		14	14	256	4096	205520896		14	14	256	4096	205520896
		bconv11	3	256	256	589824		14	14	256	4096	205520896		14	14	256	4096	205520896
		bconv12	3	256	256	589824		14	14	256	4096	205520896		14	14	256	4096	205520896
		conv13	1	256	512	131072		7	7	256	4096	51380224		7	7	512	4096	102760448
		bconv13	3	256	512	1179648		14	14	256	4096	205520896		7	7	512	4096	102760448
		bconv14	3	512	512	2359296		7	7	512	4096	102760448		7	7	512	4096	102760448
		bconv15	3	512	512	2359296		7	7	512	4096	102760448		7	7	512	4096	102760448
		bconv16	3	512	512	2359296		7	7	512	4096	102760448		7	7	512	4096	102760448
		fc1	1	512	1000	512000		1	1	512	4096	2097152		1	1	1000	4096	4096000
		Model Memory						Optimiser Memory										Activation Memory
		weight		bias		Total (MB)		b weight gradient		weight gradient		momentum 1		momentum2		Total (MB)		binary activation in		binary activation out		non-binary activations		first/last layer activations		activation gradient in		po2 activation gradient out		activation gradient out		Total (MB)		Overall Total (MB)	Savings
Method	Optimiser	#	precision	#	precision			#	precision	#	precision	#	precision	#	precision			#	precision	#	precision	#	precision	#	precision	#	precision	#	precision	#	precision
BNN	SGD+momentum	11678912	32	5800	32	44.5736		10985472	32	693440	32	11678912	32	0	32	89.103		6884950016	1	6165626880	32	1078984704	32	3911090176	32	822083584	32	822083584	32	3288334336	32	59056.4		59190.1	1x
BNN	ADAM	11678912	32	5800	32	44.5736		10985472	32	693440	32	11678912	32	11678912	32	133.655		6884950016	1	6165626880	32	1078984704	32	3911090176	32	822083584	32	822083584	32	3288334336	32	59056.4		59234.6	1x
BNN	Bop	0	32	5800	32	0.0221252		10985472	32	693440	32	11678912	32	0	32	89.103		6884950016	1	6165626880	32	1078984704	32	3911090176	32	822083584	32	822083584	32	3288334336	32	59056.4		59145.5	1x
Ours	SGD+momentum	11678912	16	5800	16	22.2868		10985472	1	693440	16	11678912	16	0	16	24.908		6884950016	1	6165626880	1	1078984704	16	3911090176	16	822083584	16	822083584	16	3288334336	16	18913.6		18960.8	3.12171
Ours	ADAM	11678912	16	5800	16	22.2868		10985472	1	693440	16	11678912	16	11678912	16	47.1837		6884950016	1	6165626880	1	1078984704	16	3911090176	16	822083584	16	822083584	16	3288334336	16	18913.6		18983	3.1204
Ours	Bop	0	16	5800	16	0.0110626		10985472	1	693440	16	11678912	16	0	16	24.908		6884950016	1	6165626880	1	1078984704	16	3911090176	16	822083584	16	822083584	16	3288334336	16	18913.6		18938.5	3.12303
